# Supplementary material
Source: PubMed Central journal article supplement (PMC9404229)

**Supplementary Table S1. Details of all identified positive cases.**

| Patient ID*               | Area             | Collection date | Delay <sup>1</sup> | Age (yr) | Sex | RT PCR | NsP3 <sup>2</sup> | RdRp <sup>2</sup> | Spike A <sup>2</sup> | Spike B <sup>2</sup> | IgM <sup>3</sup> | IgA <sup>3</sup> | IgG <sup>3</sup> | PRNT 80% <sup>4</sup> |
|---------------------------|------------------|-----------------|--------------------|----------|-----|--------|-------------------|-------------------|----------------------|----------------------|------------------|------------------|------------------|-----------------------|
| <b>Control cohort</b>     |                  |                 |                    |          |     |        |                   |                   |                      |                      |                  |                  |                  |                       |
|                           | Milan            | 24/10/2018      | 9                  | 80       | M   | -      | -                 | -                 | -                    | -                    | -                | +                | -                | NA                    |
|                           | East Milan       | 14/03/2019      | 0                  | 5        | F   | -      | -                 | -                 | -                    | -                    | -                | -                | +                | NA                    |
|                           | Milan            | 24/03/2019      | 2                  | 55       | M   | -      | -                 | -                 | -                    | -                    | -                | -                | +                | NA                    |
|                           | Brescia          | 21/05/2019      | 2                  | 48       | F   | -      | -                 | -                 | -                    | -                    | +                | -                | -                | NA                    |
|                           | North-West Milan | 27/05/2019      | 1                  | 1        | M   | -      | -                 | -                 | -                    | -                    | +                | -                | -                | NA                    |
|                           | Milan            | 24/06/2019      | 1                  | 32       | F   | -      | -                 | -                 | -                    | -                    | -                | +                | -                | NA                    |
|                           | Milan            | 12/07/2019      | 8                  | 2        | F   | -      | -                 | -                 | -                    | -                    | -                | +                | -                | 54%                   |
|                           | East Milan       | 12/07/2019      | 3                  | 51       | M   | -      | -                 | -                 | -                    | -                    | -                | +                | -                | 50%                   |
|                           | Brescia          | 20/07/2019      | 1                  | 48       | F   | -      | -                 | -                 | -                    | -                    | -                | +                | -                | -                     |
|                           | North Milan      | 01/08/2019      | 1                  | 24       | M   | -      | -                 | -                 | -                    | -                    | -                | +                | -                | 52%                   |
| <b>Pre-pandemic cases</b> |                  |                 |                    |          |     |        |                   |                   |                      |                      |                  |                  |                  |                       |
|                           | Milan            | 29/08/2019      | 1                  | 24       | F   | -      | -                 | -                 | -                    | -                    | -                | +                | -                | 59%                   |
|                           | North-East Milan | 01/09/2019      | 1                  | 35       | M   | -      | -                 | -                 | -                    | -                    | -                | +                | -                | -                     |
| 1                         | Milan            | 12/09/2019      | 3                  | 0-67     | M   | -      | -                 | -                 | -                    | +(U)                 | +                | -                | +                | -                     |
|                           | Milan            | 28/09/2019      | 0                  | 42       | M   | -      | -                 | -                 | -                    | -                    | +                | -                | -                | -                     |
| 2                         | East Milan       | 12/10/2019      | 0                  | 18       | F   | -      | -                 | -                 | -                    | +(S)                 | -                | -                | -                | -                     |
| 3                         | Brescia          | 17/10/2019      | 1                  | 9        | F   | -      | -                 | +(U)              | -                    | -                    | -                | -                | -                | -                     |
| 4                         | North-West Milan | 19/10/2019      | 1                  | 1        | M   | -      | -                 | +(S)              | -                    | -                    | -                | +                | +                | -                     |
| 5                         | Brescia          | 22/10/2019      | 1                  | 1        | F   | -      | +(S)              | -                 | -                    | -                    | +                | -                | -                | 62%                   |
| 6                         | East Milan       | 23/10/2019      | NA                 | 1        | F   | -      | -                 | +(S)              | -                    | -                    | +                | -                | -                | -                     |
| 7                         | North-West Milan | 22/11/2019      | 7                  | 2        | M   | -      | +(S)              | -                 | -                    | -                    | NA               | -                | -                | NA                    |
|                           | Milan            | 01/12/2019      | 1                  | 14       | M   | -      | -                 | -                 | -                    | -                    | -                | +                | -                | -                     |
| 8                         | West Milan       | 05/12/2019      | 4                  | 4        | M   | -      | -                 | -                 | -                    | +(S)                 | NA               | -                | -                | NA                    |
| 9                         | South-East Milan | 15/12/2019      | 2                  | 25       | F   | -      | -                 | +(U)              | +(U)                 | +(U)                 | -                | -                | -                | -                     |
| 10                        | Milan            | 09/01/2020      | 1                  | 53       | M   | -      | -                 | -                 | -                    | +(U)                 | -                | -                | -                | -                     |
| 11                        | Brescia          | 14/01/2020      | 4                  | 40       | M   | -      | -                 | -                 | -                    | +(S)                 | -                | -                | -                | NA                    |

| <b>Pandemic cases</b> |                     |            |   |    |   |   |   |     |   |   |     |     |   |       |
|-----------------------|---------------------|------------|---|----|---|---|---|-----|---|---|-----|-----|---|-------|
| 12                    | North-West<br>Milan | 15/01/2021 | 1 | 65 | F | - | - | -   | - | - | -   | +   | + | 1:60  |
| 13                    | Lodi                | 16/01/2021 | 9 | 32 | F | - | + | (U) | - | + | (U) | -   | - | -     |
| 14                    | North Milan         | 25/01/2021 | 4 | 1  | F | - | - | -   | - | - | -   | +   | + | 1:160 |
|                       | Milan               | 02/02/2021 | 1 | 1  | F | - | - | -   | - | - | -   | +   | + | -     |
| 15                    | Milan               | 26/02/2021 | 5 | 47 | M | - | - | -   | - | - | +   | (U) | - | -     |
|                       | North Milan         | 24/03/2021 | 6 | 32 | M | - | - | -   | - | - | -   | -   | + | +     |
|                       |                     |            |   |    |   |   |   |     |   |   |     |     |   | NA    |

\*Referred to Table 3 in the main text.

<sup>1</sup>Days from exanthema onset to sample collection. <sup>2</sup>U: urine, S: oropharyngeal swab. <sup>3</sup>NA: serum/data not available. <sup>4</sup>PRNT: plaque-reduction neutralization test. Either the neutralization dilution of serum that results in 80% plaque reduction or the percentage of plaque reduction (at a dilution of 1:10) for partially neutralizing samples are shown.

**Supplementary Table S2. Details of the mutations identified in this study.**

| <b>ID</b> | <b>Area</b> | <b>Collection date</b> | <b>Sequenced region (nt)</b> | <b>Nucleotide change<sup>1</sup></b> | <b>Amino acid change<sup>1</sup></b> | <b>Mutation type<sup>2</sup></b> |
|-----------|-------------|------------------------|------------------------------|--------------------------------------|--------------------------------------|----------------------------------|
| 1         | Milan       | 12/09/2019             | <b>22904-23330</b>           | <b>none</b>                          | <b>none</b>                          | /                                |
| 2         | Milan       | 12/10/2019             | <b>22904-23330</b>           | <b>none</b>                          | <b>none</b>                          | /                                |
| 3         | Brescia     | 17/10/2019             | <b>14366-14655</b>           | C14408T                              | P323L                                | $\beta_3$                        |
| 4         | Milan       | 19/10/2019             | <b>14366-14655</b>           | C14408T                              | P323L                                | $\beta_3$                        |
| 5         | Brescia     | 22/10/2019             | <b>2977-3185</b>             | C3037T,<br>T2987C,<br>T3012C         | F924F, F908L,<br>L916S               | $\beta_1$                        |
| 6         | Milan       | 23/10/2019             | <b>14366-14655</b>           | C14408T                              | P323L                                | $\beta_3$                        |
| 7         | Milan       | 22/11/2019             | <b>2977-3185</b>             | C3037T                               | F924F                                | $\beta_1$                        |
| 8         | Milan       | 05/12/2019             | <b>22904-23330</b>           | <b>none</b>                          | <b>none</b>                          | /                                |
| 9         | Milan       | 15/12/2019             | <b>22904-23681</b>           | A23403G                              | D614G                                | $\beta_2$                        |
|           |             |                        | <b>14366-14655</b>           | C14408T                              | P323L                                | $\beta_3$                        |
| 10        | Milan       | 09/01/2020             | <b>22904-23330</b>           | 23000Y, 23222R                       |                                      | /                                |
| 11        | Brescia     | 14/01/2020             | <b>22904-23330</b>           | <b>none</b>                          | <b>none</b>                          | /                                |
| 13        | Lodi        | 16/01/2021             | <b>2977-3185</b>             | C3037T                               | F924F                                | $\beta_1$                        |
|           |             |                        | <b>23310-23681</b>           | A23403G                              | D614G                                | $\beta_2$                        |
| 16        | Milan       | 26/02/2021             | <b>22904-23330</b>           | <b>none</b>                          | <b>none</b>                          | /                                |

<sup>1</sup>Referred to Wuhan HU-1 (NC\_045512.2); <sup>2</sup>Referred to Kumar et al. Mol Biol Evol 2021

Supplementary Figure S1. Electropherograms obtained from sample ID. #10.

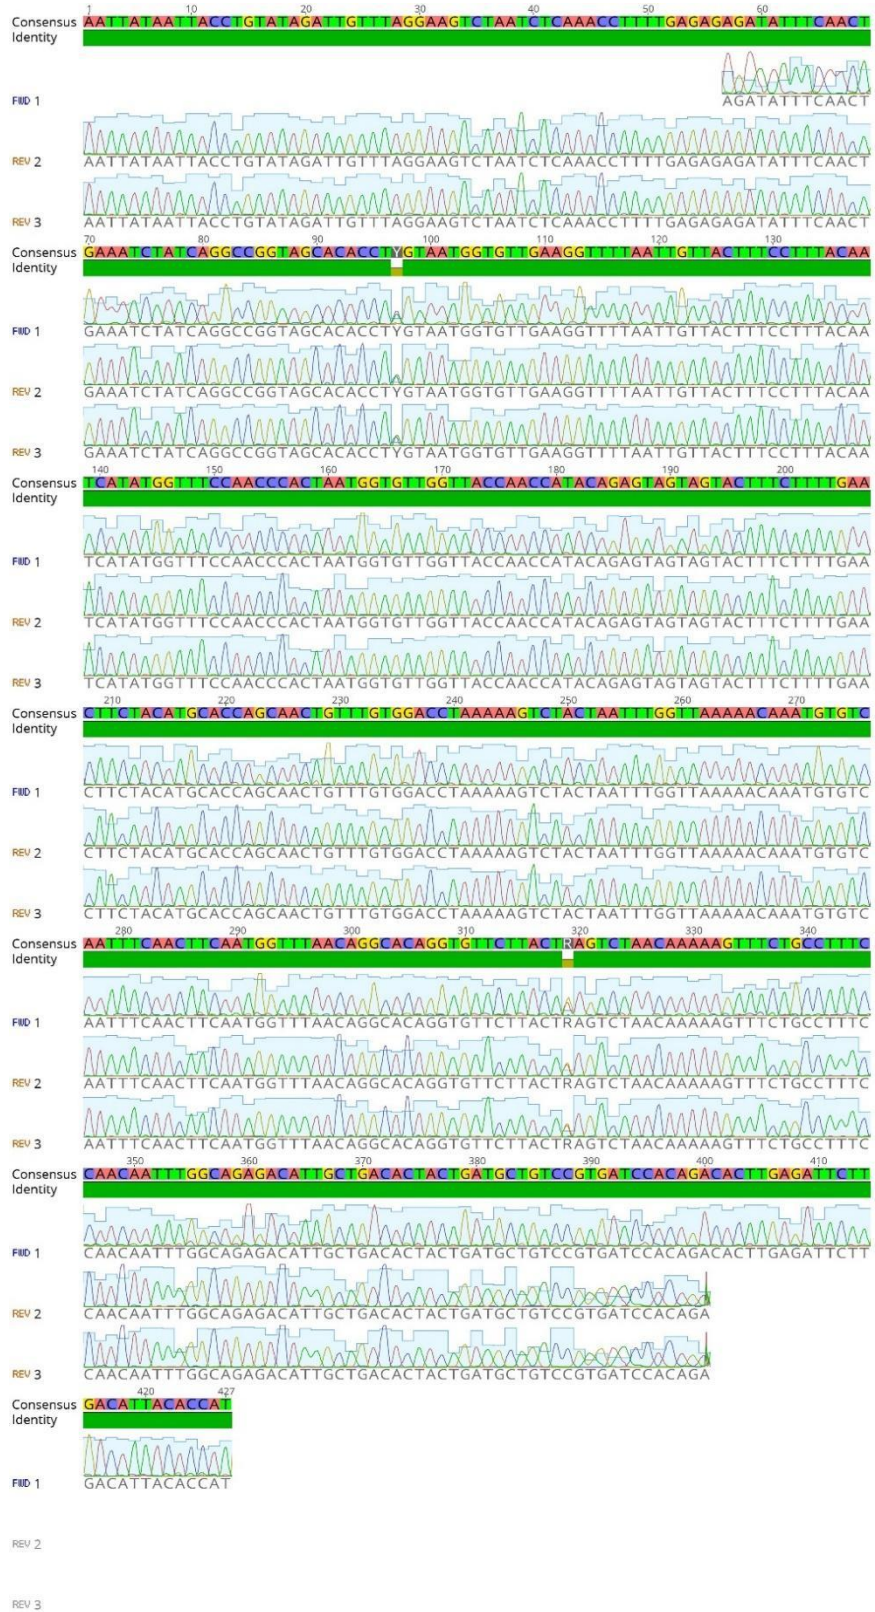

Supplement: mmc1.pdf [file mmc1.pdf]
